# Supplementary material for: Bifunctional alkyl chain barriers for efficient perovskite solar cells
Source: Royal Society of Chemistry journal article supplement (doi:10.1039/c5cc00128e), 2015-01-01
Supplement: c5cc00128e1.pdf [file c5cc00128e1.pdf]

The reaction equations of  $C_{12}H_{25}Si(OCH_3)_3$  alcoholysis (S1) and the  $\equiv SiOH$  condensation process (S2).

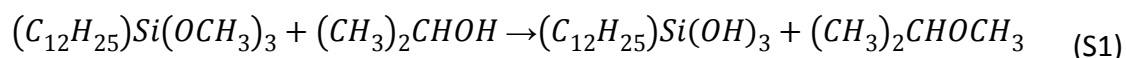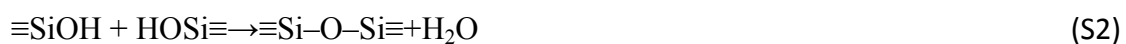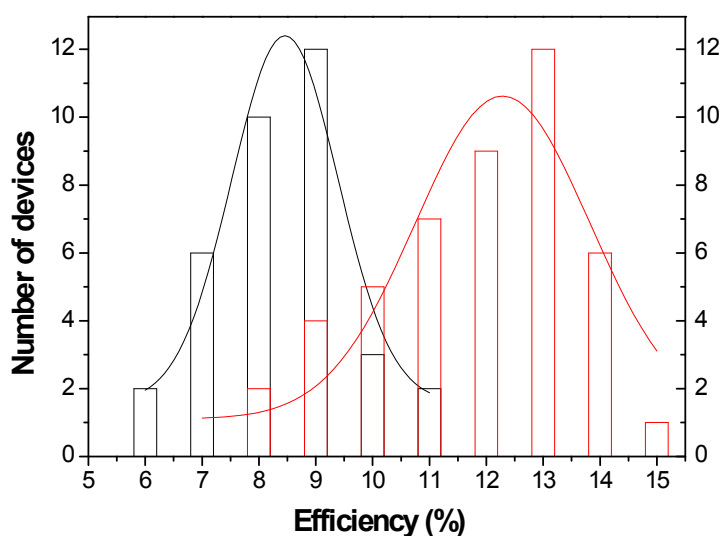

Figure S1. The efficiency distribution of the perovskite photovoltaic cells with (red bars, red fitting line) or without (dark bars, dark fitting line)  $C_{12}$ -Silane modification.

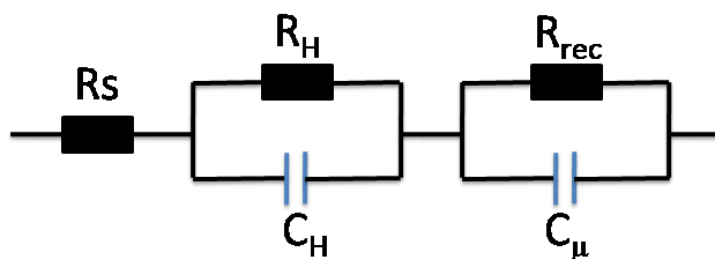

Figure S2. The equivalent circuit of the Nyquist plot.  $R_s$  represents the series resistance, One RC element ( $R_H$ ,  $C_H$ ) is related to the hole transport in spiro-OMeTAD, and the other one represents the recombination resistance ( $R_{rec}$ ) and chemical capacitance ( $C_\mu$ ) on the photoanode side.

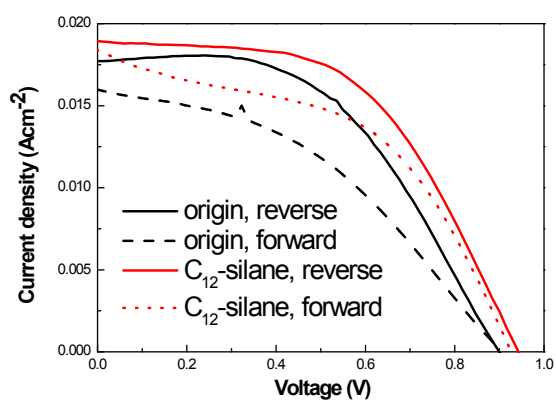

Figure S3. The hysteresis analyze of the original and 0.1M C<sub>12</sub>-silane modified perovskite solar cells.
